# Supplementary material for: Mechanistic studies of an L-proline-catalyzed pyridazine formation involving a Diels–Alder reaction with inverse electron demand
Source: PubMed Central journal article supplement (PMC6334817; doi:10.3762/bjoc.15.3), 2019-01-03
Supplement: Beilstein_J_Org_Chem-15-30-s001.pdf [file Beilstein_J_Org_Chem-15-30-s001.pdf]

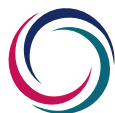

## Supporting Information

for

### **Mechanistic studies of an L-proline-catalyzed pyridazine formation involving a Diels–Alder reaction with inverse electron demand**

Anne Schnell, J. Alexander Willms, S. Nozinovic and Marianne Engeser

*Beilstein J. Org. Chem.* **2019**, *15*, 30–43. [doi:10.3762/bjoc.15.3](https://doi.org/10.3762/bjoc.15.3)

## Additional material

## Table of Contents:

### Reaction R1:

|                                                                     |            |
|---------------------------------------------------------------------|------------|
| <sup>1</sup> H NMR spectra of NMR experiment with low concentration | page S3,S4 |
| <sup>1</sup> H NMR spectrum of acetone and L-proline                | page S5    |
| Experimental description of NMR experiment at higher concentration  | page S6    |
| Temporal progress of NMR experiment at higher concentration         | page S6    |
| Experimental description of ESIMS experiment at low concentration   | page S7    |
| Temporal progress of ESIMS experiment at low concentration          | page S7    |

### Reaction R2:

|                                                                  |         |
|------------------------------------------------------------------|---------|
| Scheme S1: Two possible regioisomers of the product <b>5</b> ·Br | page S8 |
| Scheme S2: Schematic depiction of continuous flow setup          | page S9 |
| Calculations of reaction time of continuous flow setup           | page S9 |

### Reaction R3:

|                                                                      |          |
|----------------------------------------------------------------------|----------|
| CID spectrum of charge tagged catalyst <b>1</b> <sup>+</sup>         | page S10 |
| CID spectrum of adduct [ <b>1+2</b> ] <sup>+</sup> at <i>m/z</i> 549 | page S11 |

### Synthesis

|                                                                  |              |
|------------------------------------------------------------------|--------------|
| Synthetic products with numbering used for NMR signal allocation | page S11-S13 |
| Accurate mass determination with Orbitrap XL                     | page S13-S18 |

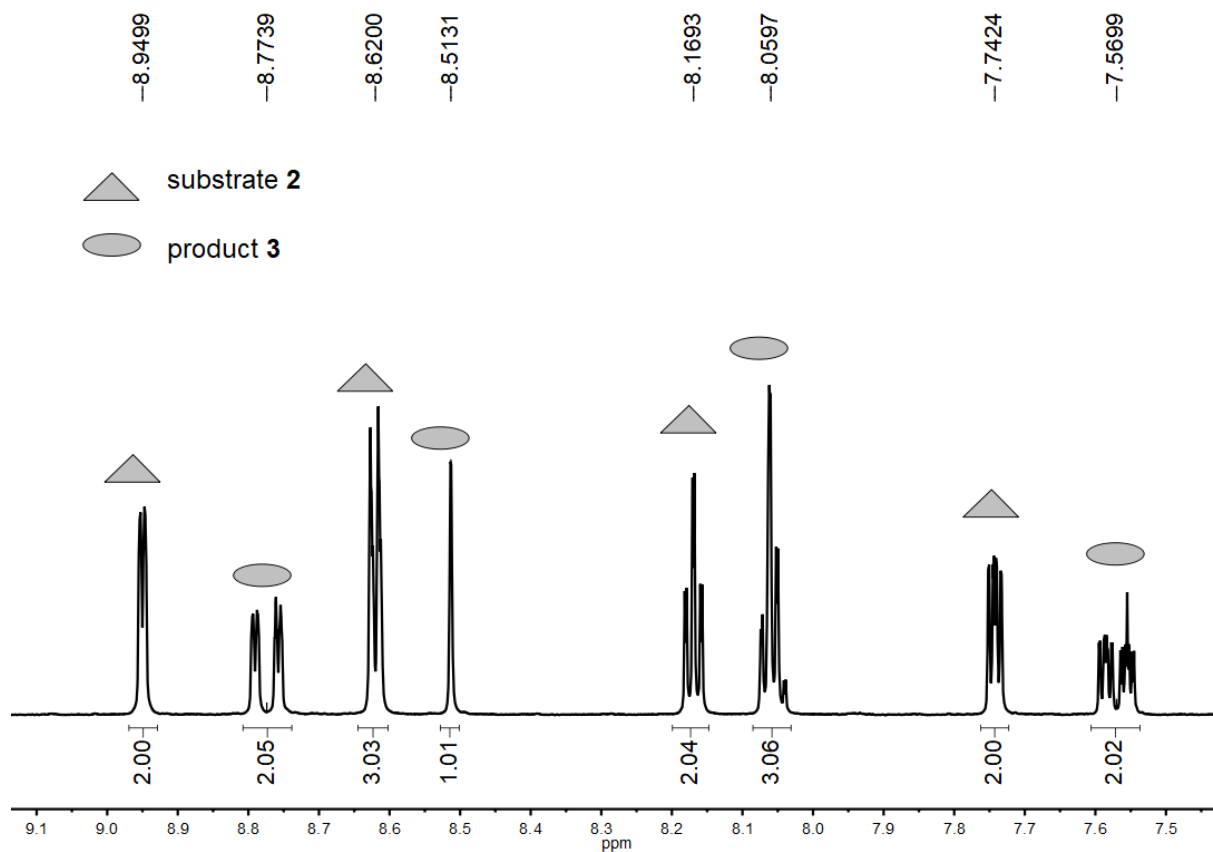

**Figure S1:**  $^1\text{H}$  NMR spectrum (aromatic region) during the NMR experiment of reaction R1 with low concentration (concentration of tetrazine 0.005 mmol/mL) after 3 h and 50% conversion.

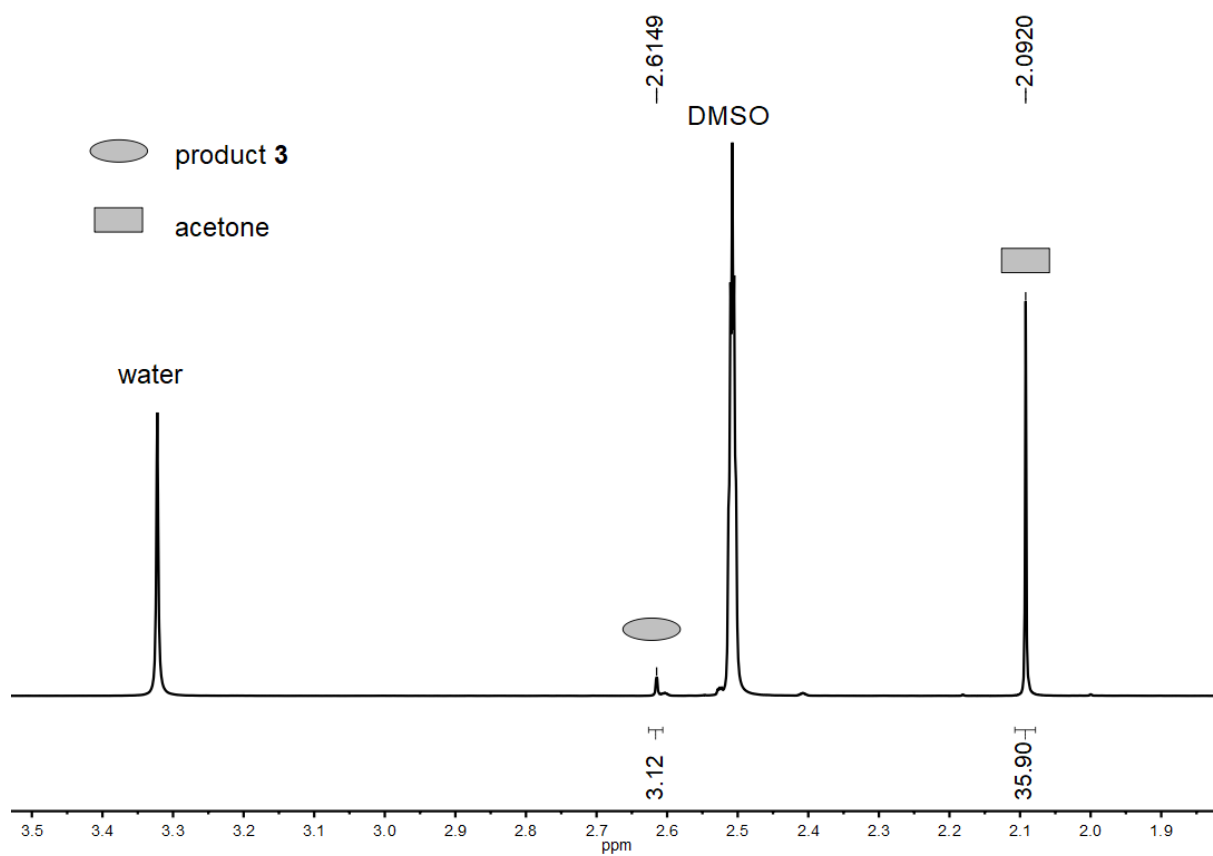

**Figure S2:** <sup>1</sup>H NMR spectrum (aliphatic region) during the NMR experiment of reaction R1 with low concentration (concentration of tetrazine 0.005 mmol/mL) after 3 h and 50% conversion.

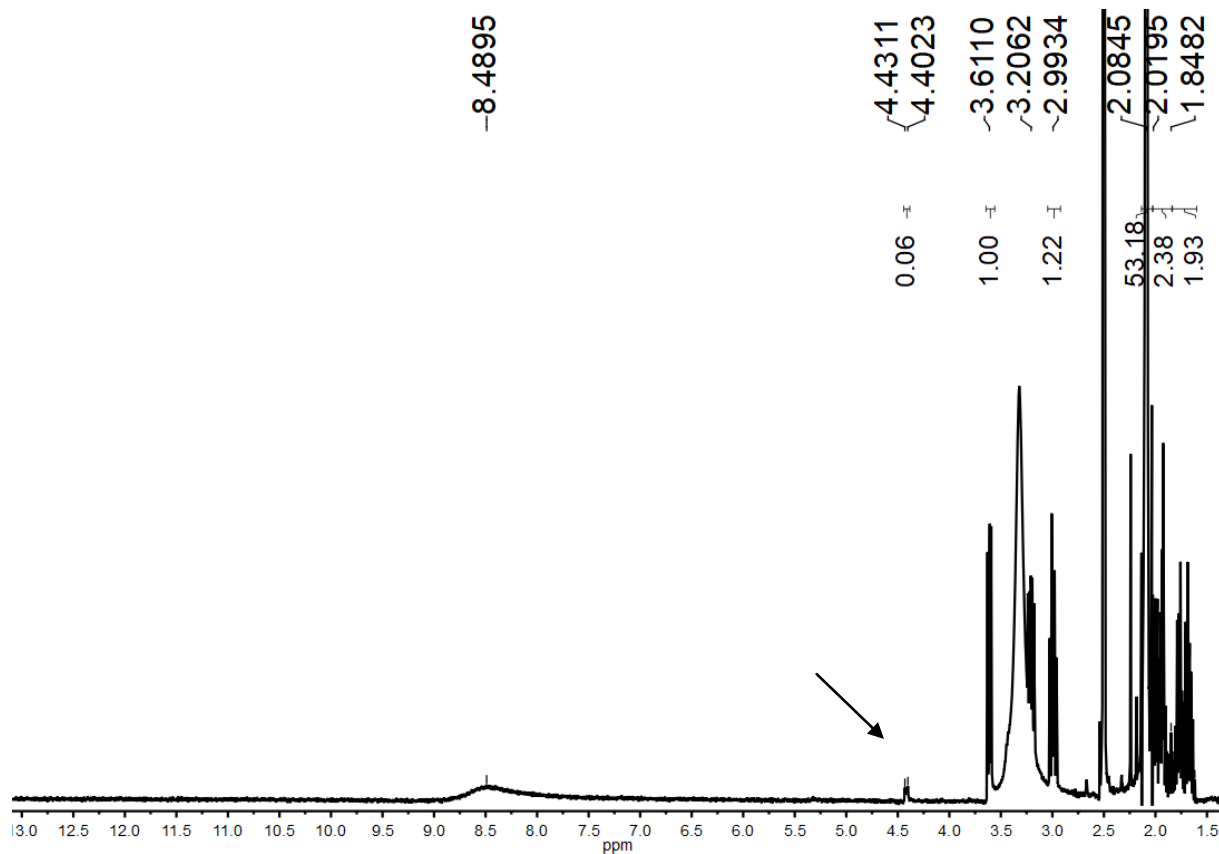

**Figure S3:**  $^1\text{H}$  NMR spectrum of the reaction mixture in absence of tetrazine, i.e., a mixture of acetone (1 equiv) and L-proline (0.01 equiv) in deuterated dimethyl sulfoxide. The arrow points at the signal at 4.4 ppm which is the significant signal for the oxazolidinone as published by List [1] and Gschwind [2]. The spectrum was measured with a Bruker Avance I 400 MHz NMR spectrometer.

### NMR study of reaction R1 at higher concentrations:

Commercially available 3,6-di-2-pyridyl-1,2,4,5-tetrazine **2** (28.3 mg, 0.12 mmol, 1.0 equiv) and L-proline (0.69 mg, 0.006 mmol, 0.05 equiv) were mixed in 3.6 mL of deuterated dimethyl sulfoxide. 0.5 mL of this mixture were transferred to the NMR sample tube. To start the reaction, a solution of acetone in deuterated dimethyl sulfoxide was added (50  $\mu$ L, 9.6 mmol/ml, 0.48 mmol, 4 equiv). The first spectrum was measured 3 minutes after the start of the reaction. Subsequent spectra were measured in regular intervals of 1 minute at rt.

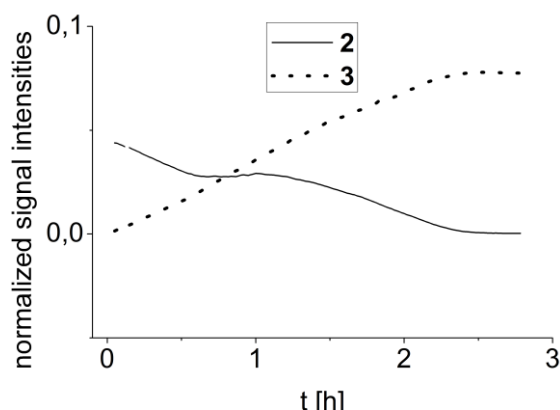

**Figure S4:** NMR study of reaction R1 at higher concentrations (concentration of tetrazine 0.033 mmol/mL). Product **3** is completely soluble at the given concentration, whereas substrate **2** is only partially dissolved. While substrate **2** transforms into the product **3**, more of substrate **2** gets dissolved until full conversion is reached.

### ESIMS study of reaction R1 at lower concentrations:

A solution of L-proline in dimethyl sulfoxide (1.353 mL, 0.76 mmol/L, 0.001 mmol, 0.05 equiv) is added to commercially available 3,6-di-2-pyridyl-1,2,4,5-tetrazine **2** (4.86 mg, 0.02 mmol, 1.0 equiv). Additional 3.02 mL of dimethyl sulfoxide were added. A solution of acetone in dimethyl sulfoxide was added last (37  $\mu$ L, 1.1 mmol/mL, 0.08 mmol, 4 equiv). The first spectrum was measured 2:20 minutes after the start of the reaction, subsequent measurements were recorded in intervals of 7.5 min.

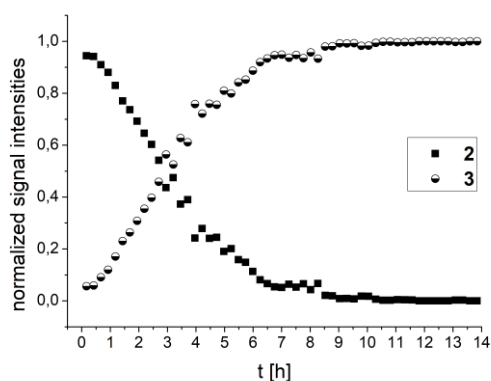

**Figure S5:** Temporal progress of reaction R1 at low concentrations (0.005 mmol/mL of tetrazine) in ESIMS experiment.

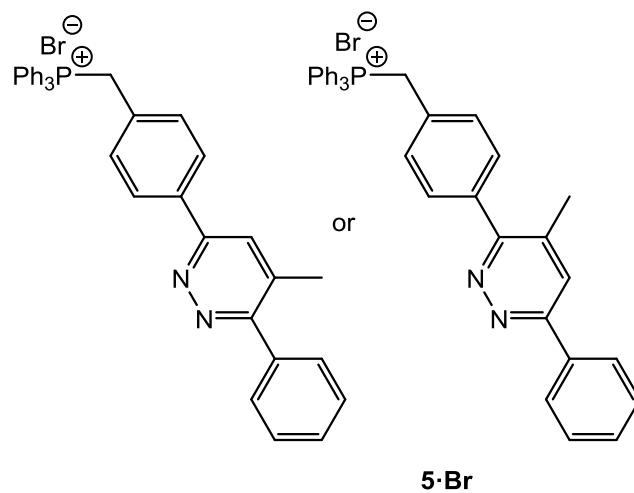

**Scheme S1:** Two possible regioisomers of **5-Br** in reaction R2.



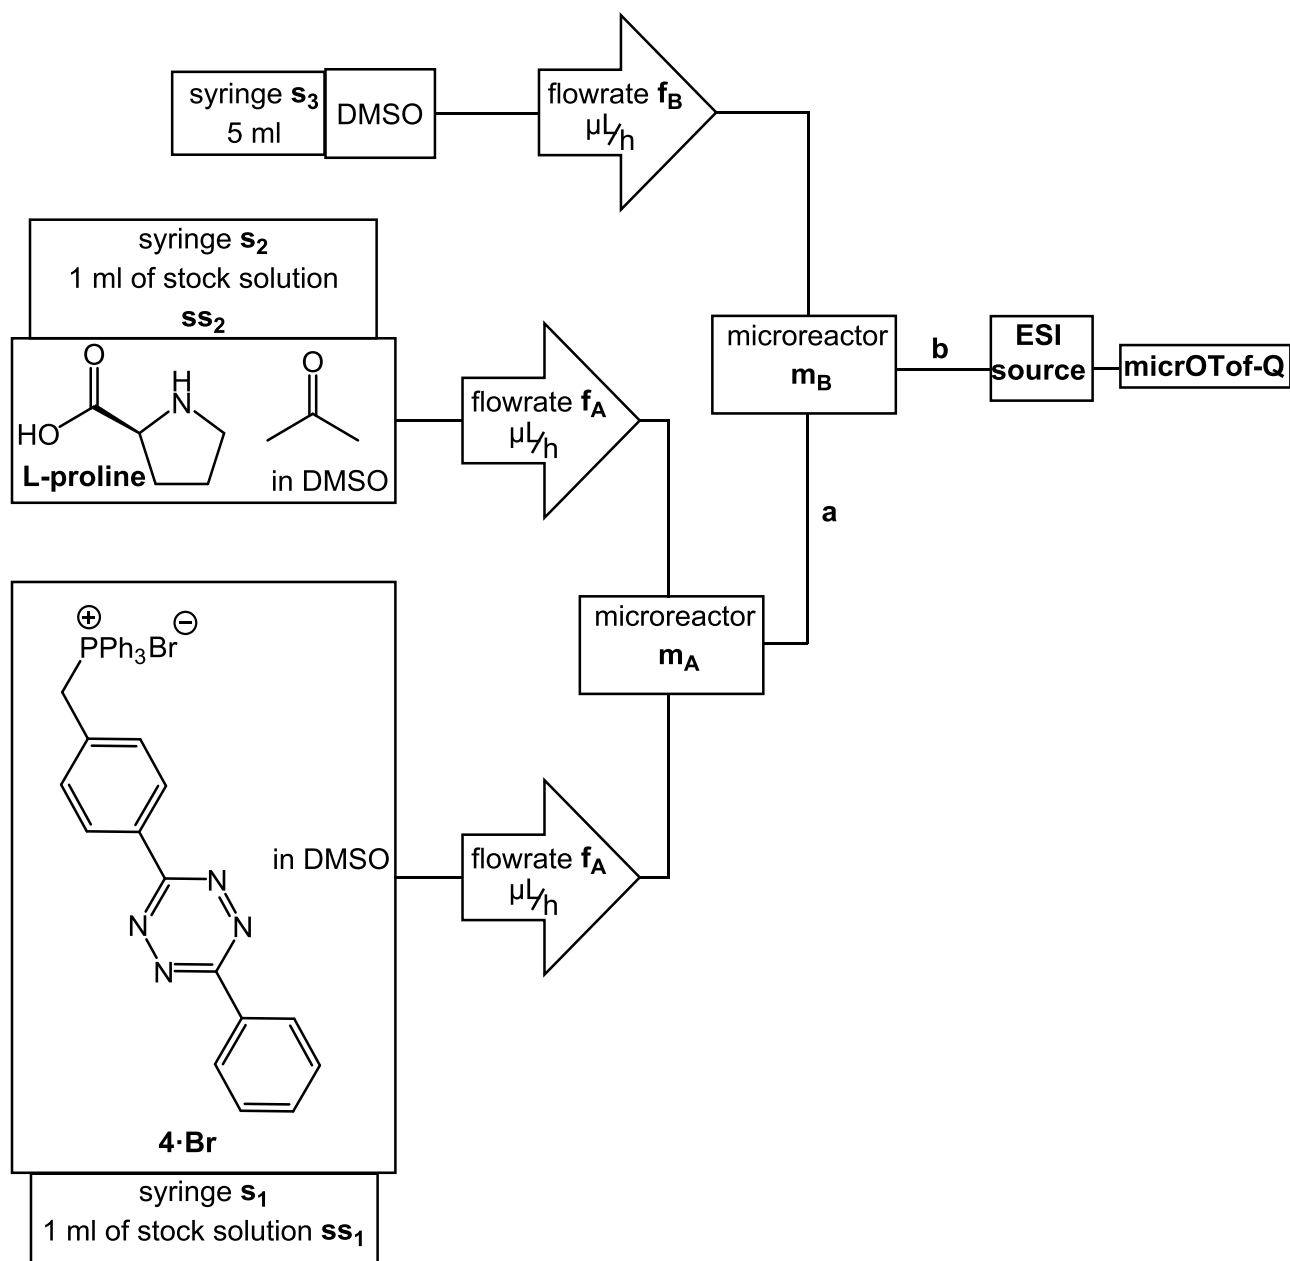

**Scheme S2:** A schematic depiction of the continuous flow setup for reaction R2.

The theoretical reaction time for the continuous flow setup was calculated by considering the experimental flow rates  $f_A$  (150  $\mu\text{L/h}$ ) and  $f_B$  (300  $\mu\text{L/h}$ ). The flowrate in tube a is assumed to be  $2 \cdot f_A = 300 \mu\text{L/h} = f_B$ . Further, the swept volume ( $V_{\text{swept}} = 2.2 \mu\text{L}$ ) in the microreactors, the dimensions of the connecting PEEK tubes (length:  $a = 357 \text{ mm}$ ,  $b = 110 \text{ mm}$ ; diameter  $d = 0.127 \text{ mm}$ ) and the volume of the ESI needle ( $V_{\text{needle}} = 0.0069115 \mu\text{L}$ ) is needed. Furthermore, the assumption was made that because the

microreactor  $m_b$  dilutes the reaction mixture by half, the reaction rate decreases according to the behavior of a bimolecular reaction, namely resulting in a fourth of the original reaction rate. The volumina  $V_a$  and  $V_b$  are defined as

$$V_a = a * \left(\frac{d}{2}\right)^2 * \pi + V_{swept}$$

$$V_b = b * \left(\frac{d}{2}\right)^2 * \pi + V_{swept} + V_{needle}$$

and in combination with the flowrates the reaction time can be calculated.

$$t = \frac{V_a}{2 * f_a} + \frac{V_b}{2 * f_b} * 0.25 = \frac{a * \left(\frac{d}{2}\right)^2 * \pi + V_{swept}}{2 * f_a} + \frac{b * \left(\frac{d}{2}\right)^2 * \pi + V_{swept} + V_{needle}}{2 * f_b} * 0.25$$

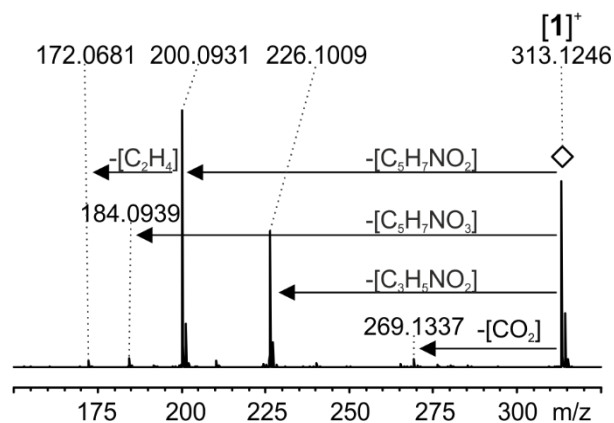

**Figure S6:** ESI(+)-CID spectrum of mass selected  $[1]^+$  ( $m/z$  313); collisional energy voltage 15 V.

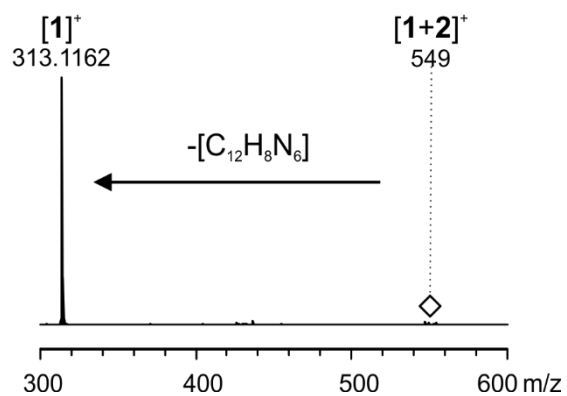

**Figure S7:** ESI(+) CID spectrum of the mass selected non-covalent adduct  $[1+2]^+$  ( $m/z$  549); collisional energy voltage 1 V.

## Synthesis

Depiction of synthetic products including the numbering used for the NMR signal allocation.

### 1-Benzoyl-2-*p*-toluoylhydrazide (**6**)

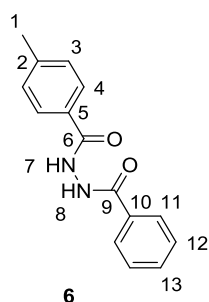

***N*-(Chlor(phenyl)methylene)-4-methylbenzohydrazonoyl chloride (7)**

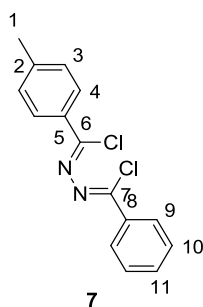

**3-(4-Methylphenyl)-6-phenyl-1,2,4,5-tetrazine (8)**

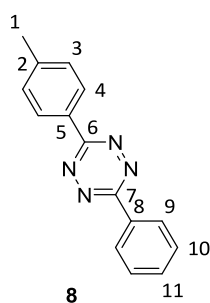

**3-(4-Bromomethylphenyl)-6-phenyl-1,2,4,5-tetrazine (9)**

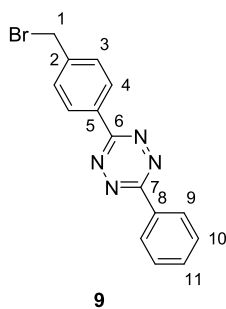

### 3-(4-Triphenylphosphoniummethylphenyl)-6-phenyl-1,2,4,5-tetrazine (4·Br)

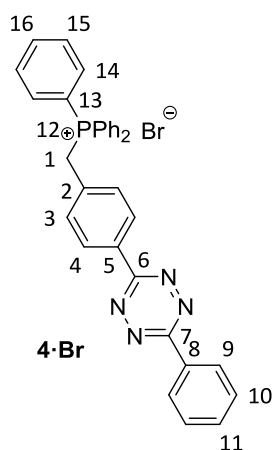

Accurate mass determination with Orbitrap XL

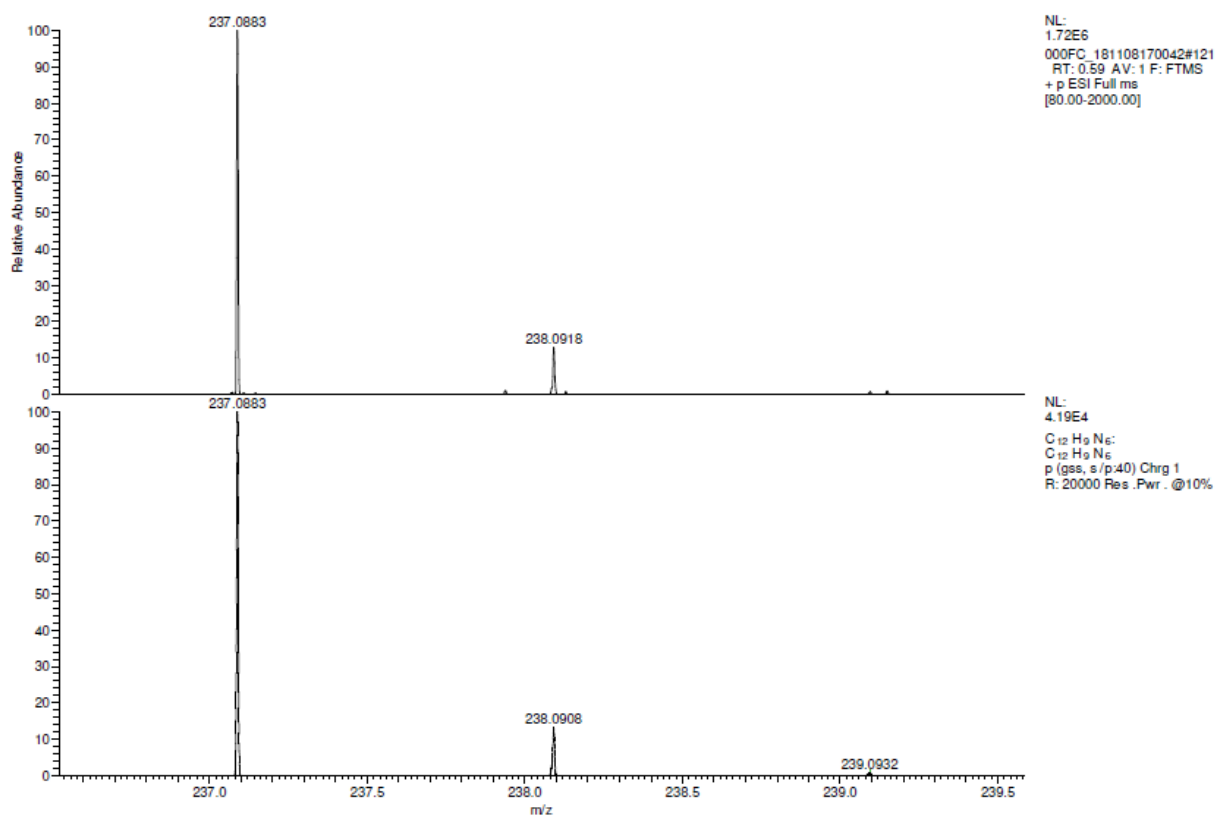

**Figure S8:** Accurate mass determination with Orbitrap XL of substrate 2 ([2+H]<sup>+</sup>).

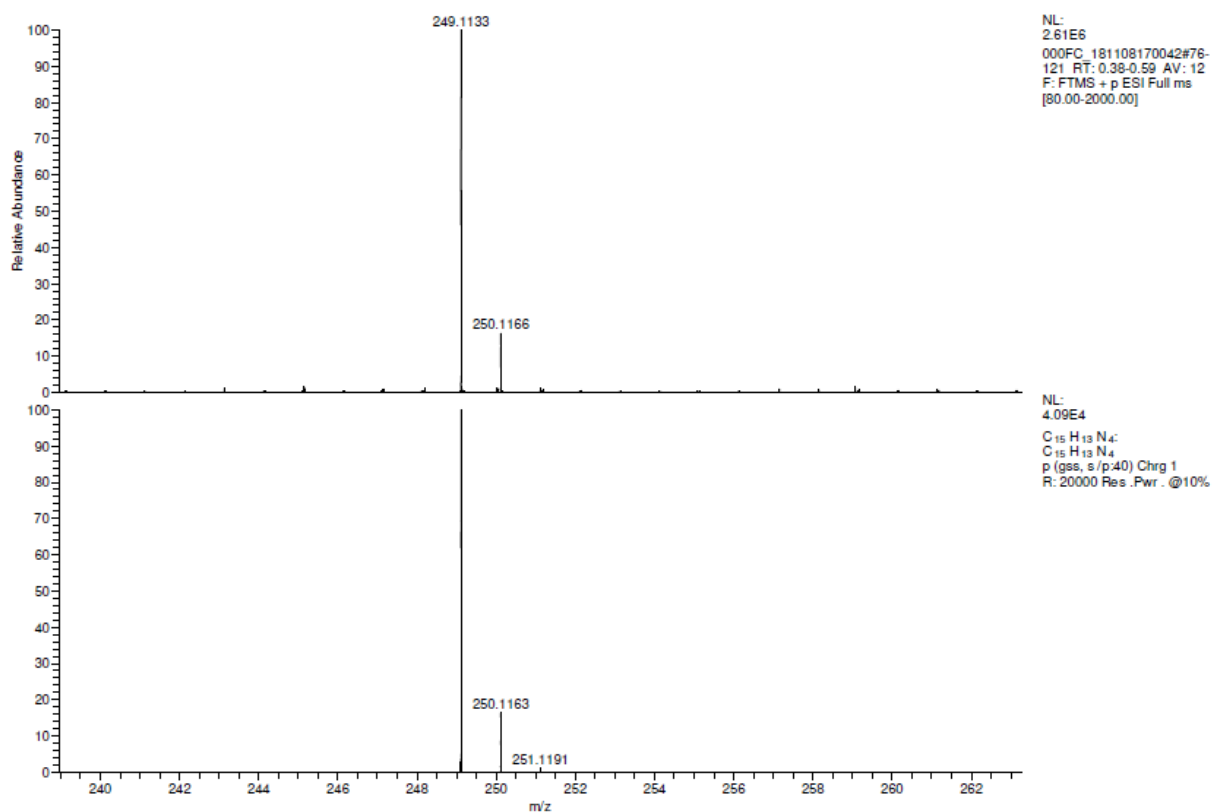

**Figure S9:** Accurate mass determination with Orbitrap XL of product **3** ( $[3+H]^+$ ).

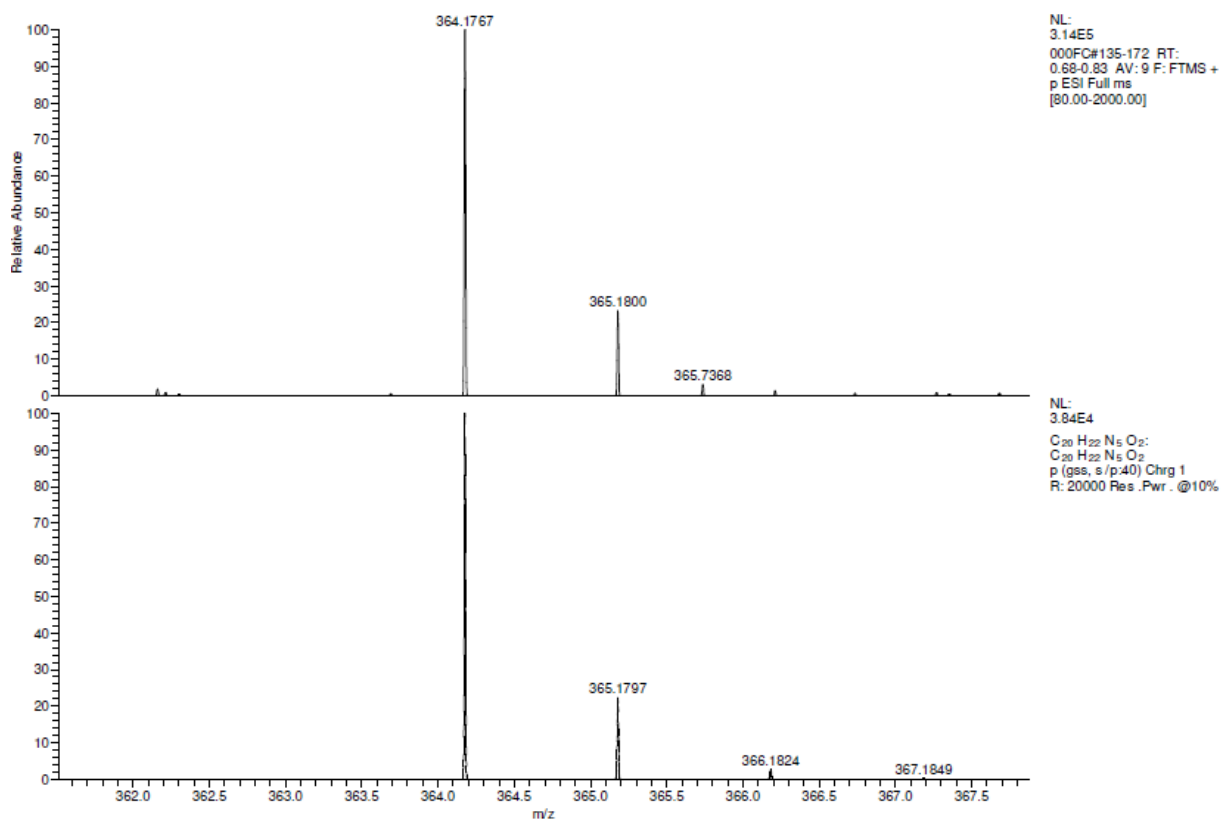

**Figure S10** Accurate mass determination with Orbitrap XL of intermediate  $\text{III}_1$  ( $[\text{III}_1+\text{H}]^+$ ).

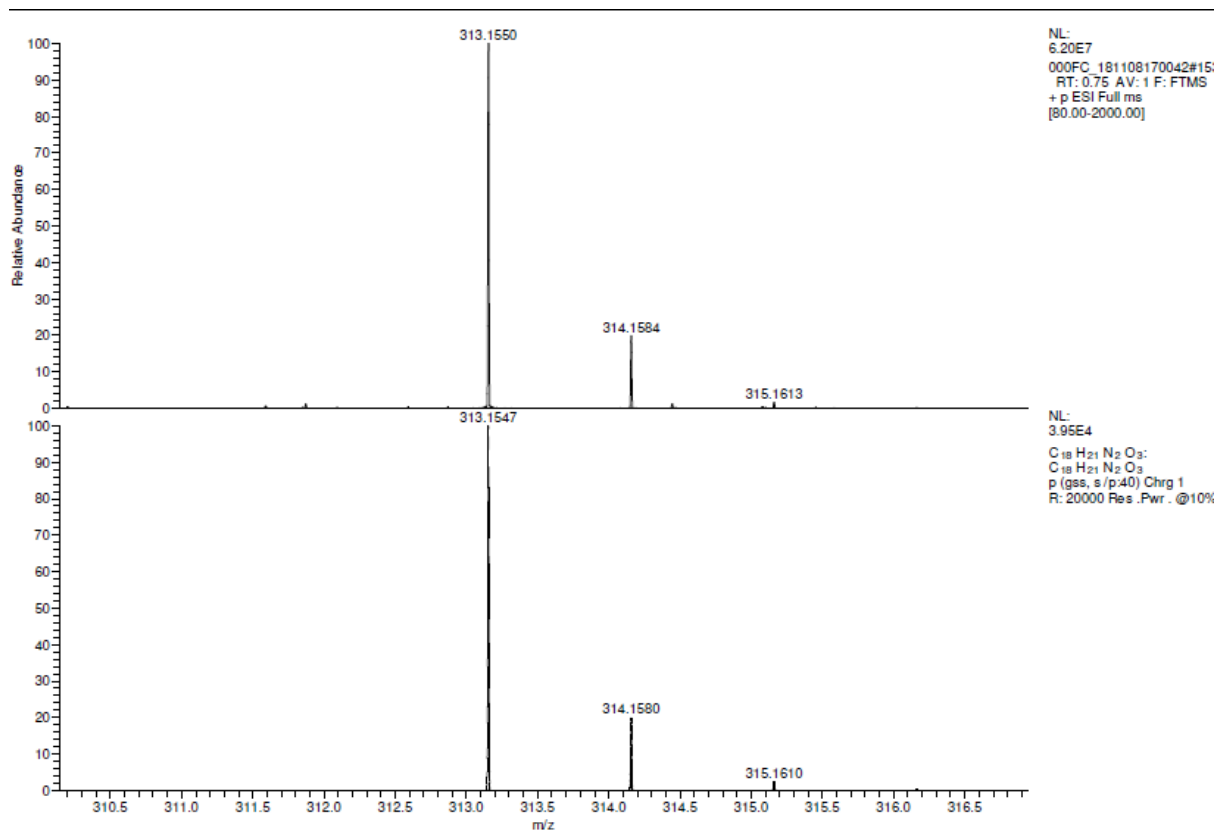

**Figure S11:** Accurate mass determination with Orbitrap XL of charge tagged catalyst 1 ([1]<sup>+</sup>).



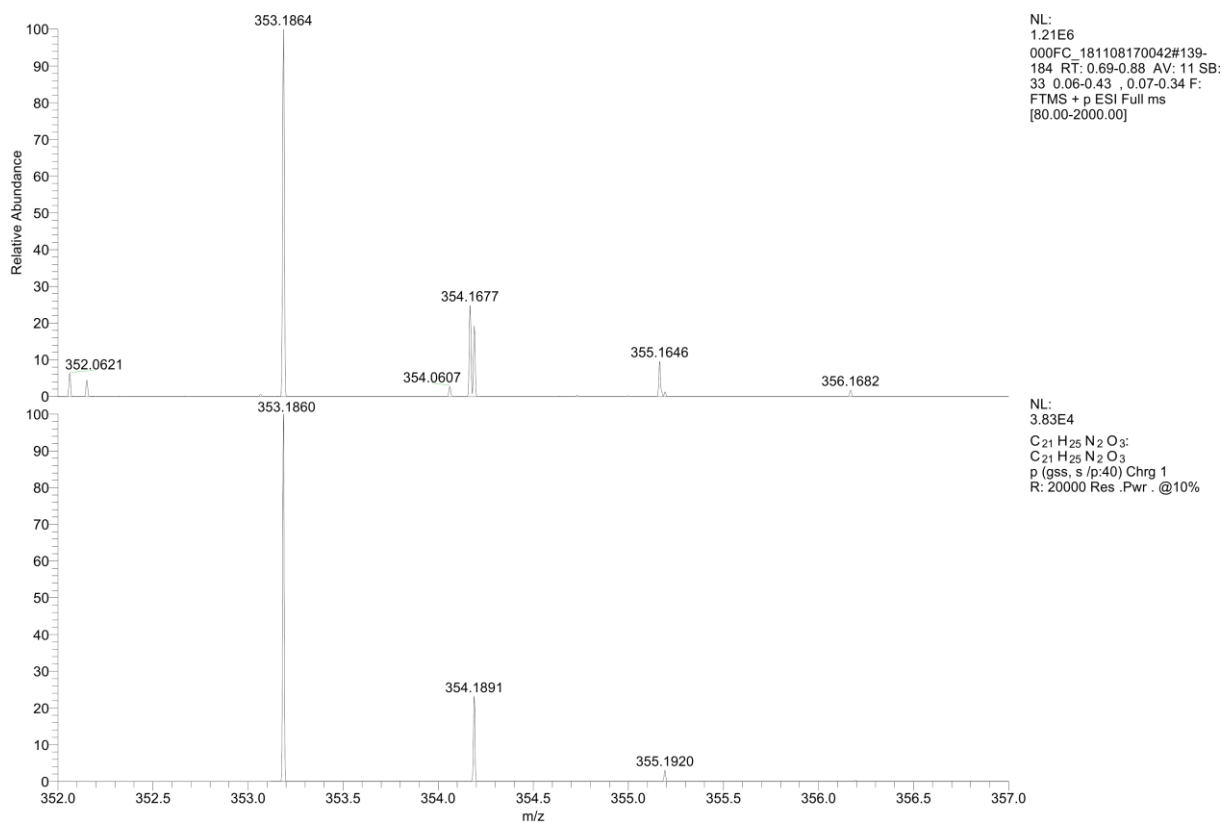

**Figure S12** Accurate mass determination with Orbitrap XL of intermediate  $I_3$  ( $[I_3]^+$ ).

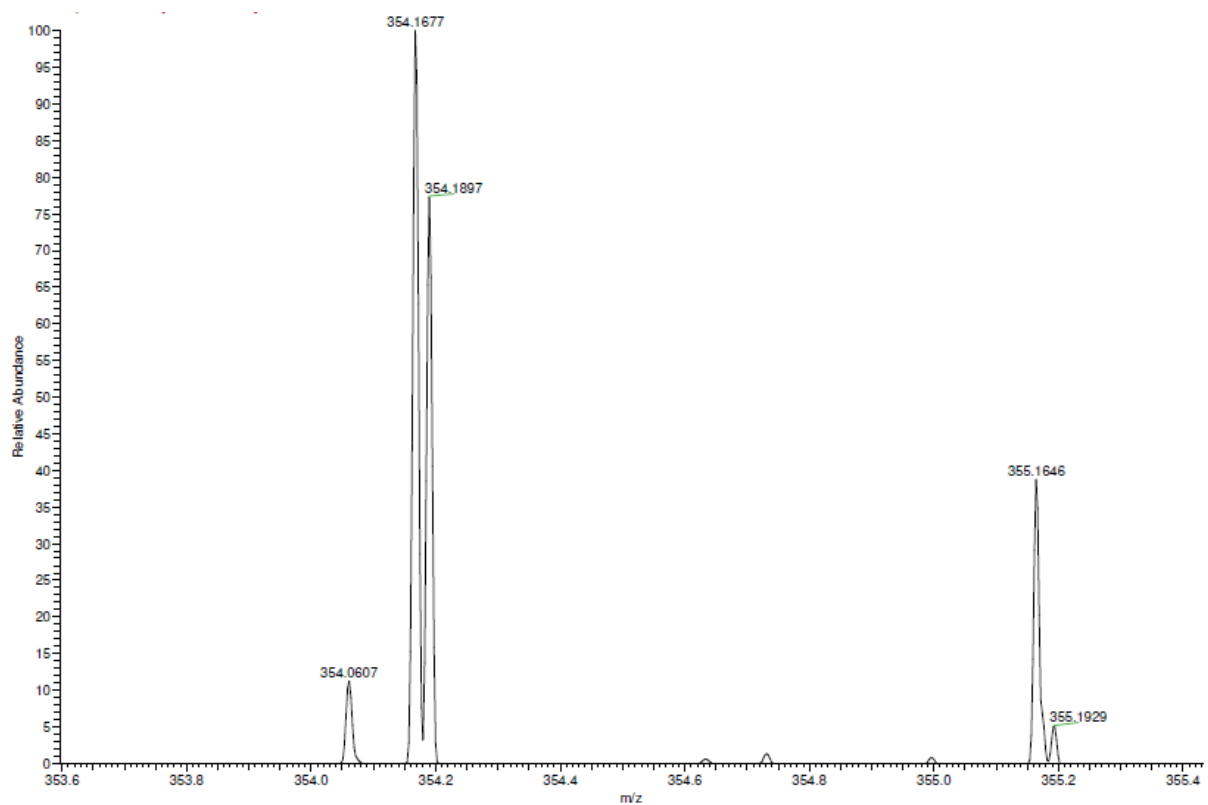

**Figure S13** Zoom into  $^{13}\text{C}$  peak of  $\text{I}_3$  ( $[\text{I}_3]^+$ ).

## References

[1] List, B.; Hoang, L.; Martin, H. J. *Proc. Natl. Acad. Sci. U. S. A.* **2004**, *101*, 5839–5842. doi:10.1073/pnas.0307979101

[2] Schmid, M. B.; Zeitler, K.; Gschwind, R. M. *Angew. Chem., Int. Ed.* **2010**, *49*, 4997–5003. doi:10.1002/anie.200906629
